# Supplementary material for: Who Will Save the Savior? The Relationship between Therapists’ Secondary Traumatic Stress, Secondary Stress Self-Efficacy, and Attitudes toward Trauma-Informed Care
Source: MDPI journal article supplement (doi:10.3390/bs13121012), 2023-12-13
Supplement: s1 [file s1]

## Supplementary Materials

### *Supplementary material:* Demographic and professional characteristics of the therapists

| Background characteristics      | Values                                        | Frequency  |
|---------------------------------|-----------------------------------------------|------------|
| Gender                          | Male                                          | 11 (10.9%) |
|                                 | Female                                        | 90 (89.1%) |
| Religiousness of the therapist  | Ultra – Orthodox ( <i>Haredi</i> )            | 28 (27.7%) |
|                                 | Religious                                     | 45 (44.6%) |
|                                 | Traditional                                   | 5 (5.0%)   |
|                                 | Secular                                       | 23 (22.8%) |
| Profession                      | Social worker                                 | 74 (73.3%) |
|                                 | Psychological therapist                       | 9 (8.9%)   |
|                                 | Therapist through art / education professions | 18 (17.8%) |
| Education                       | B. A                                          | 12 (11.9%) |
|                                 | M.A                                           | 86 (85.1%) |
|                                 | Ph.D.                                         | 3 (3.0%)   |
| Intensiveness of TIC training   | Without TIC training                          | 4 (4.0%)   |
|                                 | Short TIC training                            | 47 (46.5%) |
|                                 | Intensive TIC training                        | 50 (49.5%) |
| Initiator of the training       | Without TIC training                          | 4 (4.0%)   |
|                                 | Self-initiative course                        | 47 (46.5%) |
|                                 | Workplace- initiative course                  | 50 (49.5%) |
| Therapy center characteristics  | Local municipal service center                | 63 (62.4%) |
|                                 | Government / national service center          | 17 (16.8%) |
|                                 | NGO/ Independent service center               | 21 (20.8%) |
| Client's level of religiousness | Orthodox                                      | 53 (52.5%) |
|                                 | Religious                                     | 13 (12.9%) |
|                                 | Traditional                                   | 13 (12.9%) |
|                                 | Secular                                       | 22 (21.8%) |
| Therapy setting                 | No dyad                                       | 82 (81.2%) |
|                                 | Dyad treatment                                | 19 (18.8%) |
| Security emergency area         | no                                            | 82 (81.2%) |
|                                 | yes                                           | 19 (18.8%) |
| TIC supervision                 | no                                            | 42 (41.6%) |
|                                 | yes                                           | 59 (58.4%) |
